# Supplementary material for: Sensitive and selective detection of mercury ions based on papain and 2,6-pyridinedicarboxylic acid functionalized gold nanoparticles
Source: Royal Society of Chemistry journal article supplement (doi:10.1039/c5ra23157d), 2015-12-22
Supplement: c5ra23157d1.pdf [file c5ra23157d1.pdf]

# Supporting Information (SI)

## **Sensitive and selective detection of mercury ions based on papain and 2, 6-Pyridinedicarboxylic acid functionalized gold nanoparticles**

Cui Lai <sup>a, b, \*</sup>, Lei Qin <sup>a, b</sup>, Guangming Zeng <sup>a, b, \*</sup>, Yunguo Liu <sup>a, b</sup>, Danlian Huang <sup>a, b</sup>, Chen Zhang <sup>a, b</sup>, Piao Xu <sup>a, b</sup>, Min Cheng <sup>a, b</sup>, Xiangbin Qin <sup>c</sup>, Manman Wang <sup>a, b</sup>

<sup>a</sup> *College of Environmental Science and Engineering, Hunan University, Changsha 410082, Hunan, PR China*

<sup>b</sup> *Key Laboratory of Environmental Biology and Pollution Control (Hunan University), Ministry of Education, Changsha 410082, Hunan, PR China*

<sup>c</sup> *School of Mathematics and Statistics, Central South University, Changsha 410075, Hunan, PR China*

Total number of pages of Supporting Information: 7 (including cover page)

Number of Figures in Supporting Information: 6

---

\* Corresponding author at: College of Environmental Science and Engineering, Hunan University, Changsha, Hunan 410082, China. Tel.: +86-731- 88822754; fax: +86-731-88823701. E-mail address: laicui@hnu.edu.cn (C.Lai) and zgming@hnu.edu.cn (G.M. Zeng).

\* Corresponding author at: College of Environmental Science and Engineering, Hunan University, Changsha, Hunan 410082, China. Tel.: +86-731- 88822754; fax: +86-731-88823701. E-mail address: laicui@hnu.edu.cn (C.Lai) and zgming@hnu.edu.cn (G.M. Zeng).

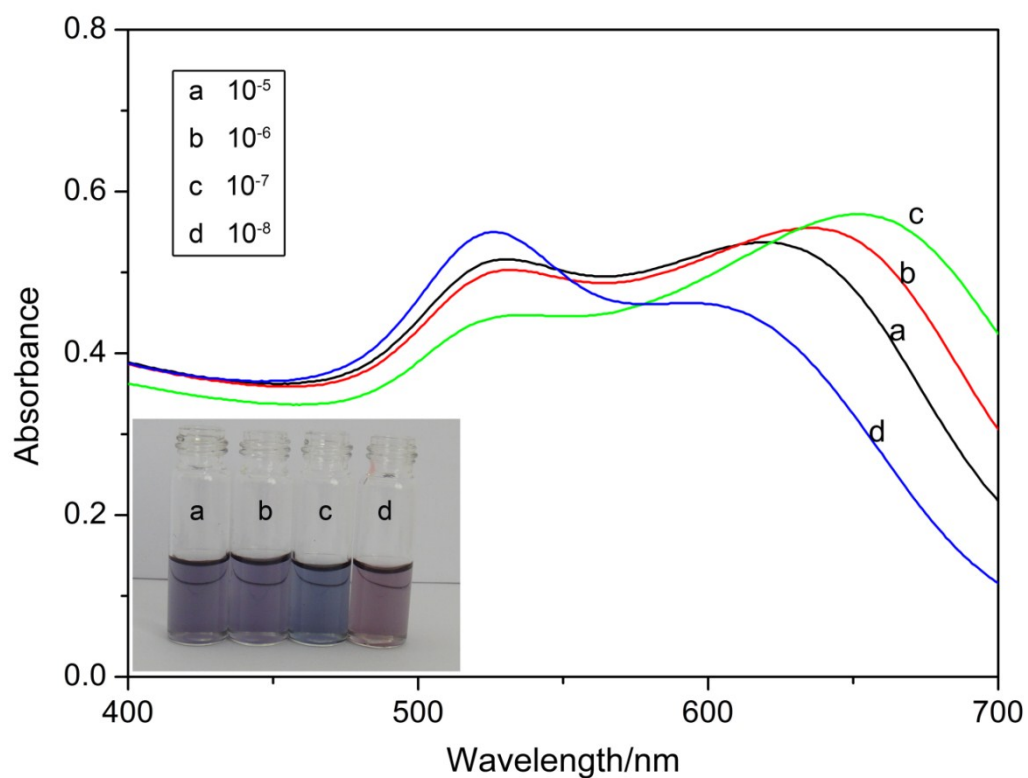

**Fig. S-1** UV-Vis absorption spectra of the P-PDCA-AuNPs with different concentration of papain ((a)  $1.0 \times 10^{-5}$ , (b)  $1.0 \times 10^{-6}$ , (c)  $1.0 \times 10^{-7}$ , (d)  $1.0 \times 10^{-8}$  M) in the presence of 1 mM Hg<sup>2+</sup>.

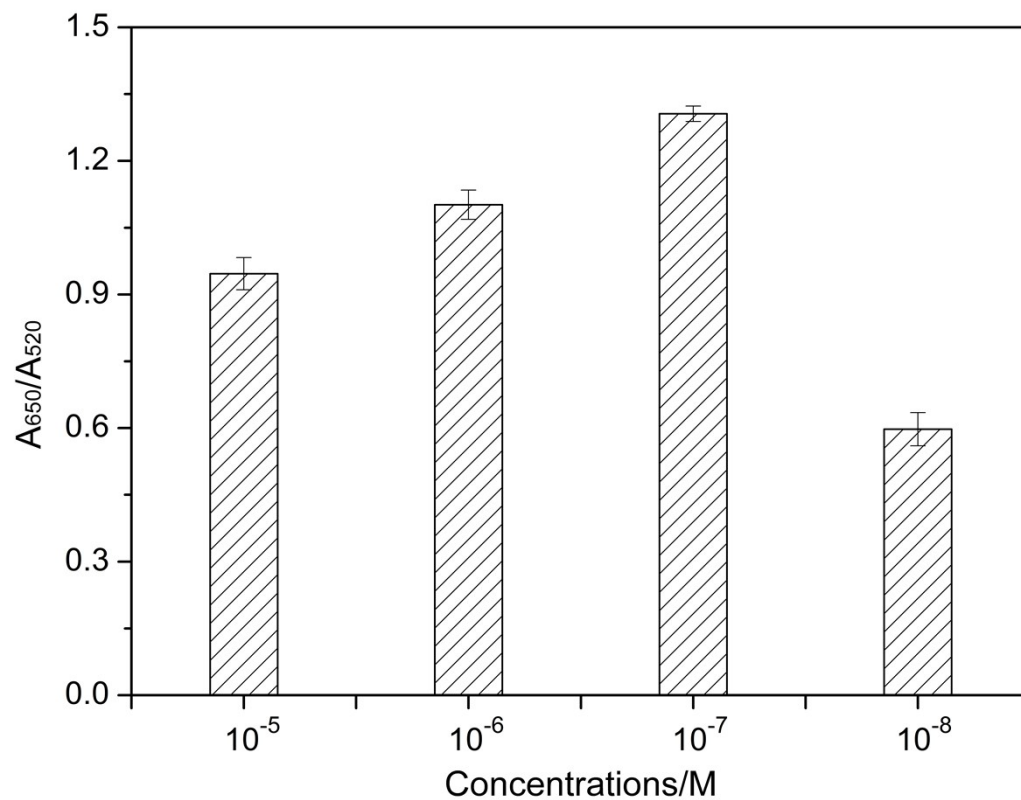

**Fig. S-2**  $A_{650}/A_{520}$  values of P-PDCA-AuNPs versus the concentrations of papain ( $1.0 \times 10^{-5}$ ,  $1.0 \times 10^{-6}$ ,  $1.0 \times 10^{-7}$ ,  $1.0 \times 10^{-8}$  M) in the presence of 1 mM  $\text{Hg}^{2+}$ . Error bars were obtained from three experiments.

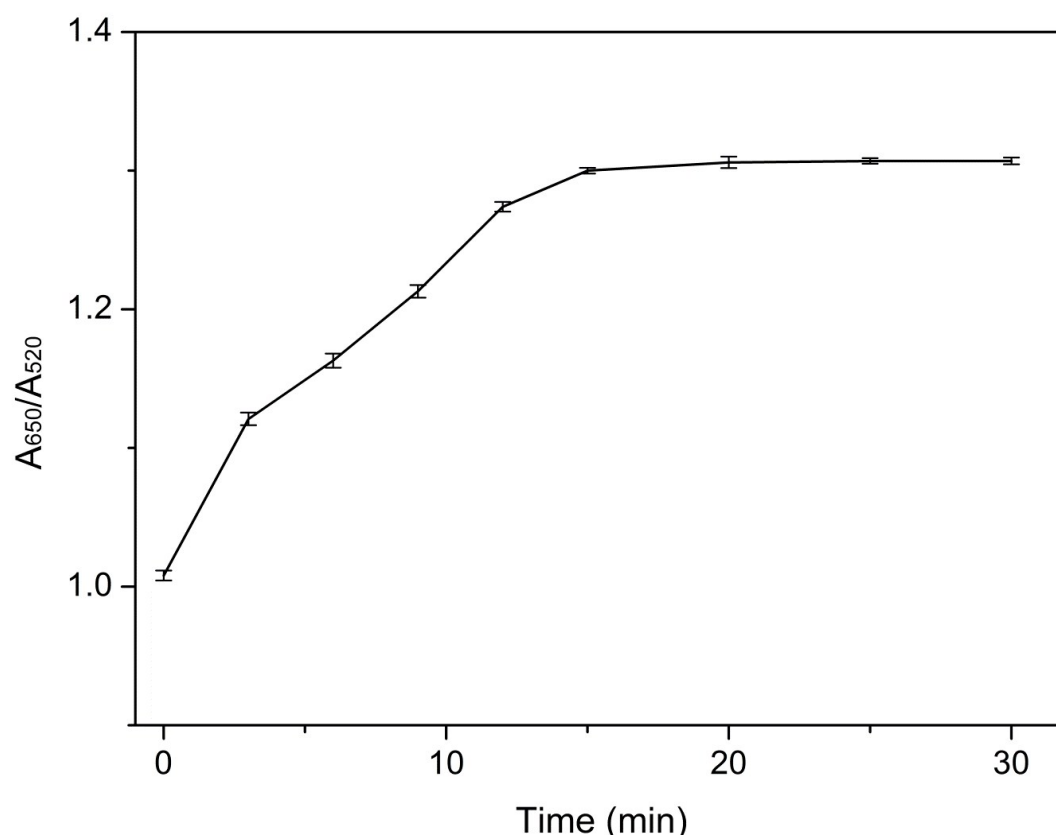

**Fig. S-3**  $A_{650}/A_{520}$  values of P-PDCA-AuNPs with the changes of time in the presence of 1 mM  $Hg^{2+}$ . When the time was increased to 15 min, the  $A_{650}/A_{520}$  values of P-PDCA-AuNPs began to level off, suggesting that the optimal incubated time was 15 min. Error bars were obtained from three experiments.

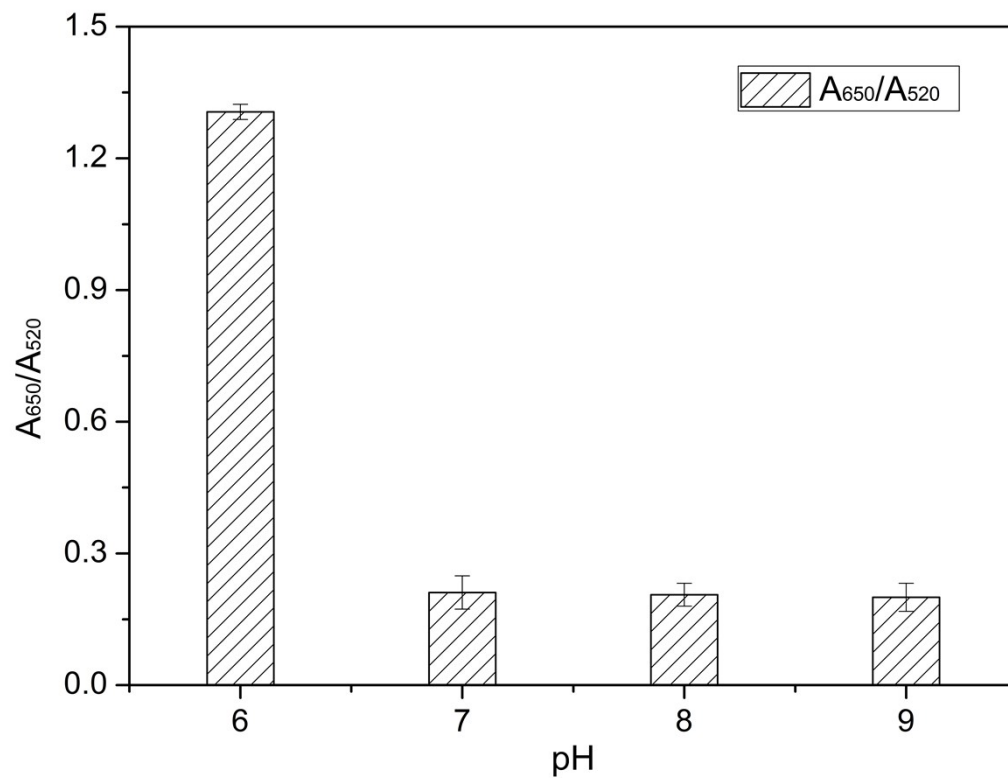

**Fig. S-4**  $A_{650}/A_{520}$  of P-PDCA-AuNPs with different pH (6, 7, 8, 9) in the presence of 1 mM  $Hg^{2+}$ . Error bars were obtained from three experiments.

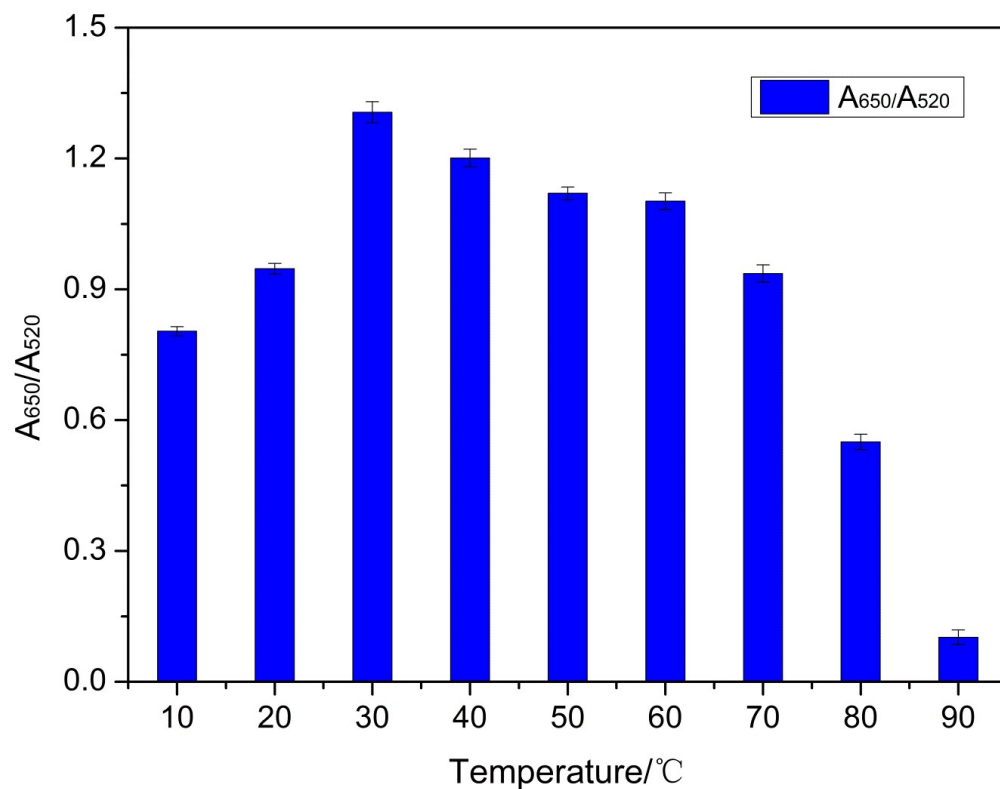

**Fig. S-5**  $A_{650}/A_{520}$  of P-PDCA-AuNPs with different temperatures (10, 20, 30, 40, 50, 60, 70, 80, 90 °C) in the presence of 1 mM  $Hg^{2+}$ . Error bars were obtained from three experiments.

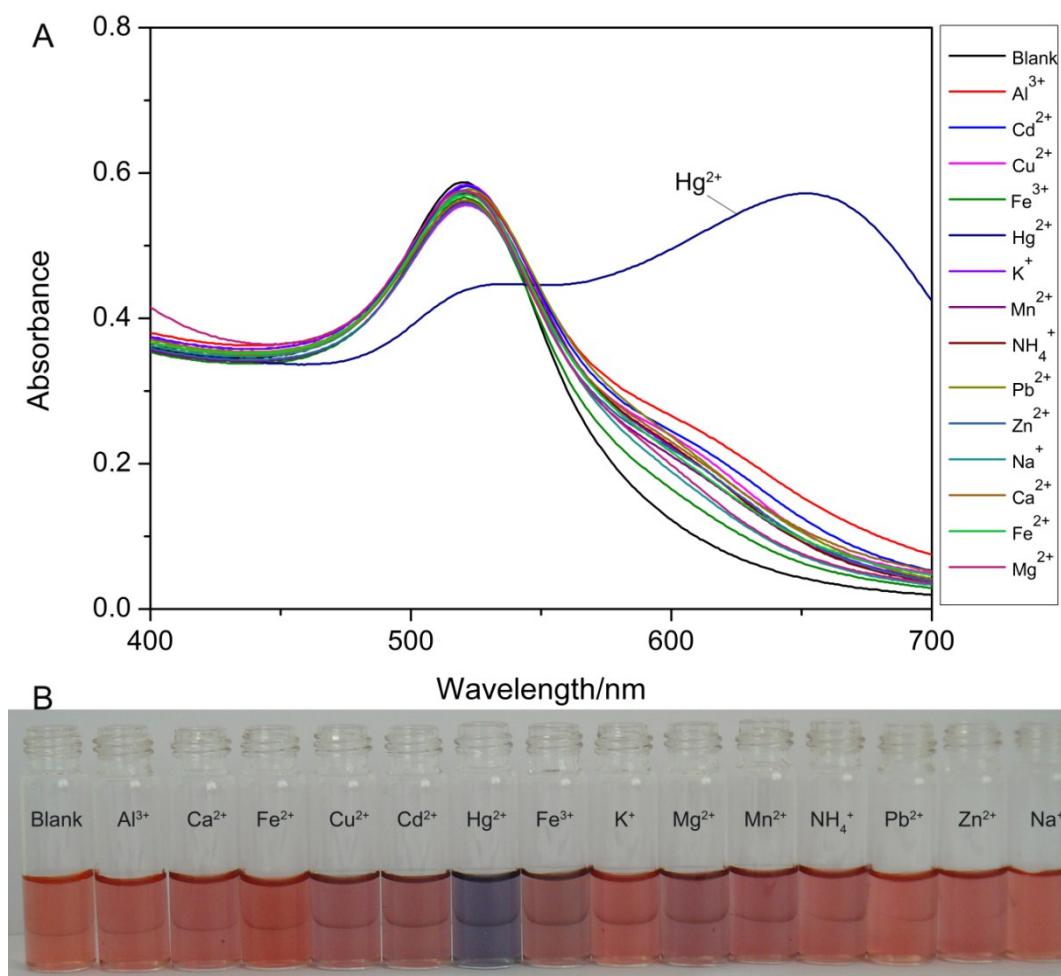

**Fig. S-6** (A) UV-Vis absorption spectra of P-PDCA-AuNPs in the presence of different kinds of ions. (B) Color changes of P-PDCA-AuNPs in the presence of different kinds of ions. Concentration of  $\text{Hg}^{2+}$  was 1 mM, while others were 20 mM.
